# Supplementary material for: Rhizobacteria Mitigate the Negative Effect of Aluminum on Pea Growth by Immobilizing the Toxicant and Modulating Root Exudation
Source: MDPI journal article supplement (doi:10.3390/plants11182416), 2022-09-16
Supplement: s1 [file s1]

Table S1. Utilization of organic acids, amino acids and sugars by *Ps. fluorescens* SPB2137 as a sole source of carbon or nitrogen in batch culture.

| Organic acids and sugars |                         | Amino acids   |                         |                         |
|--------------------------|-------------------------|---------------|-------------------------|-------------------------|
| Substance                | Utilization as C source | Substance     | Utilization as N source | Utilization as C source |
| t-Aconitic acid          | ±                       | ACC           | ++                      | -                       |
| Arabinose                | +++                     | Alanine       | +++                     | +++                     |
| Citric acid              | +++                     | Arginine      | ++                      | ++                      |
| Fructose                 | +++                     | Aspartic acid | +++                     | ++                      |
| Fumaric acid             | +++                     | Glycine       | +++                     | +++                     |
| Glucose                  | +++                     | Glutamic acid | +                       | -                       |
| Lactic acid              | +++                     | Glutamine     | ++                      | +++                     |
| Malic acid               | ++                      | Histidine     | +++                     | +++                     |
| Maltose                  | ±                       | Isoleucine    | +++                     |                         |
| Melibiose                | -                       | Leucine       | ++                      | ++                      |
| Oxalic acid              | ++                      | Lysine        | +++                     | ++                      |
| Propionic acid           | ±                       | Methionine    | ++                      | -                       |
| Pyroglutamic acid        | +++                     | Phenylalanine | ++                      | ++                      |
| Pyruvic acid             | +++                     | Proline       | ++                      | ++                      |
| Ribose                   | ++                      | Serine        | ++                      | -                       |
| Succinic acid            | ++                      | Threonine     | +                       | -                       |
| Sucrose                  | +++                     | Tryptophan    | +                       | -                       |
| Xylose                   | ++                      | Tyrosine      | ++                      | ++                      |
|                          |                         | Valine        | +                       | +                       |

+++ abundant growth; ++ average growth; + weak growth; - lack of growth. All presented properties of *Ps. fluorescens* SPB2137 and its GFP tagged variant SPB2137gfp were similar (data for SPB2137gfp are not shown).

Table S2. The effect of Al and *Ps. fluorescens* SPB2137gfp on exudation of organic acids ( $\mu\text{g g}^{-1}$  root dry weight) by the studied pea genotypes.

| Treatments           | Organic acid ions |                    |                 |                 |                  |
|----------------------|-------------------|--------------------|-----------------|-----------------|------------------|
|                      | Acetate           | Citrate            | Lactate         | Pyroglutamate   | Succinate        |
| Pea genotype VIR1903 |                   |                    |                 |                 |                  |
| -Al-Pf               | 262 $\pm$ 49 c    | 16 $\pm$ 4 a       | 227 $\pm$ 24 b  | 126 $\pm$ 24 c  | 259 $\pm$ 59 b   |
| -Al+Pf               | 65 $\pm$ 13 a     | nd                 | 92 $\pm$ 22 a   | 21 $\pm$ 10 a   | 18 $\pm$ 2 a     |
| +Al-Pf               | 702 $\pm$ 63 d    | 6392 $\pm$ 829 d   | 419 $\pm$ 32 cd | 266 $\pm$ 46 de | 1546 $\pm$ 159 e |
| +Al+Pf               | 389 $\pm$ 49 c    | 6286 $\pm$ 1266 cd | 541 $\pm$ 49 d  | 150 $\pm$ 29 cd | 368 $\pm$ 87 bc  |
| Pea genotype VIR8473 |                   |                    |                 |                 |                  |
| -Al-Pf               | 148 $\pm$ 14 b    | 16 $\pm$ 1 a       | 185 $\pm$ 19 b  | 5 $\pm$ 1 a     | 269 $\pm$ 50 b   |
| -Al+Pf               | nd                | 6 $\pm$ 1 a        | 45 $\pm$ 4 a    | nd              | nd               |
| +Al-Pf               | 896 $\pm$ 153 d   | 3127 $\pm$ 535 bc  | 351 $\pm$ 45 c  | 40 $\pm$ 8 a    | 1017 $\pm$ 114 d |
| +Al+Pf               | nd                | 1818 $\pm$ 398 b   | 320 $\pm$ 59 c  | nd              | 17 $\pm$ 7 a     |
| Pea genotype VIR7307 |                   |                    |                 |                 |                  |
| -Al-Pf               | 152 $\pm$ 23 b    | 6 $\pm$ 2 a        | 61 $\pm$ 13 a   | 330 $\pm$ 73 e  | 164 $\pm$ 47 b   |
| -Al+Pf               | 45 $\pm$ 20 a     | nd                 | 70 $\pm$ 26 a   | nd              | 64 $\pm$ 11 a    |
| +Al-Pf               | 445 $\pm$ 83 c    | 2429 $\pm$ 801 bc  | 206 $\pm$ 29 b  | 281 $\pm$ 47 e  | 656 $\pm$ 126 cd |
| +Al+Pf               | 144 $\pm$ 32 b    | 3881 $\pm$ 1154 c  | 88 $\pm$ 26 a   | 189 $\pm$ 27 d  | 158 $\pm$ 7 b    |
| Pea genotype VIR8353 |                   |                    |                 |                 |                  |
| -Al-Pf               | 104 $\pm$ 16 ab   | nd                 | 105 $\pm$ 21 a  | 194 $\pm$ 23 d  | 699 $\pm$ 111 cd |
| -Al+Pf               | 64 $\pm$ 17 a     | nd                 | 69 $\pm$ 29 a   | 14 $\pm$ 13 a   | 264 $\pm$ 14 b   |
| +Al-Pf               | 363 $\pm$ 72 c    | 3412 $\pm$ 892 bc  | 688 $\pm$ 128 d | 116 $\pm$ 27 c  | 1008 $\pm$ 106 d |
| +Al+Pf               | 77 $\pm$ 13 a     | 3529 $\pm$ 742 bc  | 223 $\pm$ 49 b  | 59 $\pm$ 16 b   | 604 $\pm$ 150 c  |

Treatments: -Al-Pf — Al-untreated and uninoculated control plants, -Al+Pf — Al-untreated and inoculated plants, +Al-Pf — Al-treated and uninoculated plants, +Al+Pf — Al-treated and inoculated plants. Data are means  $\pm$  SE. Different lowercase letters show significant differences between treatments (least significant difference test,  $p < 0.05$ ,  $n = 3$ ). nd stands for not detected.

Table S3. The effect of Al and *Ps. fluorescens* SPB2137gfp on exudation of amino acids ( $\mu\text{g g}^{-1}$  root dry weight) by the studied pea genotypes.

| Treatments           | Amino acids       |                  |                  |                  |                  |                |                  |                  |                  |
|----------------------|-------------------|------------------|------------------|------------------|------------------|----------------|------------------|------------------|------------------|
|                      | Ala               | Arg              | Asp              | Glu              | Gly              | His            | Ile              | Leu              | Lys              |
| Pea genotype VIR1903 |                   |                  |                  |                  |                  |                |                  |                  |                  |
| -Al-Pf               | 17,2 $\pm$ 1.7 b  | 1,4 $\pm$ 0,3 a  | 2,0 $\pm$ 0,2 a  | 6,7 $\pm$ 1.8 b  | 0,9 $\pm$ 0.5 ab | 26 $\pm$ 4 a   | 7,7 $\pm$ 0.5 d  | 5,4 $\pm$ 0.6 cd | 7,9 $\pm$ 1.8 c  |
| -Al+Pf               | 8,6 $\pm$ 1.8 a   | nd               | 0,6 $\pm$ 0,2 a  | 0,5 $\pm$ 0.1 a  | 3,3 $\pm$ 0.6 c  | nd             | nd               | 0,1 $\pm$ 0.1 a  | nd               |
| +Al-Pf               | 31,1 $\pm$ 3.6 cd | nd               | 19,5 $\pm$ 3,6 d | 37,3 $\pm$ 5.2 c | 5,9 $\pm$ 1.5 cd | 395 $\pm$ 5 e  | 3,7 $\pm$ 0.3 c  | 4,1 $\pm$ 0.1 c  | 6,1 $\pm$ 1.0 bc |
| +Al+Pf               | 30,4 $\pm$ 5.6 bc | nd               | 25,0 $\pm$ 3,5 d | 34,8 $\pm$ 6.4 c | 1,2 $\pm$ 0.1 a  | 38 $\pm$ 4 ab  | 9,6 $\pm$ 1.5 d  | 10,9 $\pm$ 1.6 d | 13,3 $\pm$ 3.7 d |
| Pea genotype VIR8473 |                   |                  |                  |                  |                  |                |                  |                  |                  |
| -Al-Pf               | 6,7 $\pm$ 1.6 a   | 6,9 $\pm$ 1,9 b  | 2,0 $\pm$ 0,1 a  | 7,2 $\pm$ 1.4 b  | 4,4 $\pm$ 0.4 cd | 4 $\pm$ 1 a A  | 2,1 $\pm$ 0.6 b  | 2,3 $\pm$ 0.8 a  | 2,9 $\pm$ 1.0 ab |
| -Al+Pf               | 6,0 $\pm$ 0.8 a   | 6,7 $\pm$ 3,9 b  | 2,2 $\pm$ 1,0 a  | 9,6 $\pm$ 5.0 b  | 2,0 $\pm$ 0.3 b  | nd             | 0,5 $\pm$ 0.3 a  | 0,8 $\pm$ 0.3 a  | 1,5 $\pm$ 0.4 a  |
| +Al-Pf               | 2,0 $\pm$ 0.2 a   | 10,6 $\pm$ 1,5 b | 2,8 $\pm$ 0,1 a  | 1,2 $\pm$ 0.1 a  | 2,3 $\pm$ 0.6 b  | nd             | 0,6 $\pm$ 0.2 a  | 0,9 $\pm$ 0.4 a  | 1,0 $\pm$ 0.4 a  |
| +Al+Pf               | 43,1 $\pm$ 8.0 d  | 7,7 $\pm$ 0.4 b  | 44,6 $\pm$ 5,8 e | 47,9 $\pm$ 4.9 c | 6,3 $\pm$ 1.4 d  | 18 $\pm$ 5 a   | 3,8 $\pm$ 0.9 bc | 7,3 $\pm$ 1.9 d  | 6,5 $\pm$ 0.7 bc |
| Pea genotype VIR7307 |                   |                  |                  |                  |                  |                |                  |                  |                  |
| -Al-Pf               | 5,6 $\pm$ 2.3 a   | 5,6 $\pm$ 3,2 b  | 4,2 $\pm$ 1,2 ab | 9,5 $\pm$ 2.9 b  | nd               | 56 $\pm$ 16 b  | 1,2 $\pm$ 0.2 ab | 1,0 $\pm$ 0.2 a  | 1,8 $\pm$ 0.4 a  |
| -Al+Pf               | 23,4 $\pm$ 2.7 bc | 15,0 $\pm$ 6,9 b | 0,4 $\pm$ 0,1 a  | 1,3 $\pm$ 0.3 a  | 0,5 $\pm$ 0.1 a  | 5 $\pm$ 3 a    | 0,7 $\pm$ 0.2 a  | 1,1 $\pm$ 0.4 a  | 0,9 $\pm$ 0.3 a  |
| +Al-Pf               | 2,1 $\pm$ 0.1 a   | nd               | 2,7 $\pm$ 0,1 a  | 5,9 $\pm$ 0.3 b  | nd               | 244 $\pm$ 13 d | 1,2 $\pm$ 0.1 ab | 1,3 $\pm$ 0.2 a  | 3,7 $\pm$ 0.3 ab |
| +Al+Pf               | 9,2 $\pm$ 3.6 a   | nd               | 10,9 $\pm$ 1,4 c | 12,5 $\pm$ 3.5 b | 0,9 $\pm$ 0.1 a  | 17 $\pm$ 10 a  | 3,4 $\pm$ 1.6 bc | 3,6 $\pm$ 1.8 bc | 8,1 $\pm$ 0.6 c  |
| Pea genotype VIR8353 |                   |                  |                  |                  |                  |                |                  |                  |                  |
| -Al-Pf               | 1,4 $\pm$ 0.3 a   | nd               | 3,7 $\pm$ 0,2 a  | 5,4 $\pm$ 0.2 a  | 0,2 $\pm$ 0.1 a  | 68 $\pm$ 4 b   | 0,6 $\pm$ 0.1 a  | 0,6 $\pm$ 0.1 a  | 2,9 $\pm$ 0.5 ab |
| -Al+Pf               | 22,6 $\pm$ 6.4 bc | nd               | 1,0 $\pm$ 0,3 a  | 4,1 $\pm$ 1.6 a  | 0,3 $\pm$ 0.2 a  | 38 $\pm$ 10 ab | 1,4 $\pm$ 0.5 ab | 1,9 $\pm$ 0.8 a  | 3,9 $\pm$ 1.3 ab |
| +Al-Pf               | 0,3 $\pm$ 0.1 a   | nd               | 3,4 $\pm$ 0,4 a  | 5,3 $\pm$ 1.2 a  | 0,3 $\pm$ 0.1 a  | 165 $\pm$ 4 c  | 0,4 $\pm$ 0.1 a  | 0,8 $\pm$ 0.1 a  | 5,7 $\pm$ 1.4 bc |
| +Al+Pf               | 8,6 $\pm$ 1.3 a   | nd               | 6,9 $\pm$ 0,6 b  | 8,7 $\pm$ 1.0 a  | 0,4 $\pm$ 0.1 a  | 145 $\pm$ 16 c | 2,6 $\pm$ 0.6 b  | 3,6 $\pm$ 1.0 bc | 7,6 $\pm$ 1.5 c  |

Treatments: -Al-Pf — Al-untreated and uninoculated control plants, -Al+Pf — Al-untreated and inoculated plants, +Al-Pf — Al-treated and uninoculated plants, +Al+Pf — Al-treated and inoculated plants. Data are means  $\pm$  SE. Different lowercase letters show significant differences between treatments (least significant difference test,  $p < 0.05$ ,  $n = 3$ ). nd stands for not detected.

Table S4. The effect of Al and *Ps. fluorescens* SPB2137gfp on exudation of sugars ( $\mu\text{g g}^{-1}$  root dry weight) by the studied pea genotypes.

| Treatments           | Amino acids      |                 |                 |                   |                 |                |                   |                 |                  |
|----------------------|------------------|-----------------|-----------------|-------------------|-----------------|----------------|-------------------|-----------------|------------------|
|                      | Met              | Orn             | Phe             | Pro               | Thr             | Ser            | Trp               | Tyr             | Val              |
| Pea genotype VIR1903 |                  |                 |                 |                   |                 |                |                   |                 |                  |
| -Al-Pf               | nd               | 0,3 $\pm$ 0.1 a | 4,2 $\pm$ 0.4 b | 1,5 $\pm$ 0.2 a   | 44 $\pm$ 1 b    | 7 $\pm$ 1 a    | 1,2 $\pm$ 0.3 a   | 1,3 $\pm$ 0.5 b | 11,8 $\pm$ 0.3 c |
| -Al+Pf               | nd               | 0,1 $\pm$ 0.1 a | 0.1 $\pm$ 0.1 a | 1,3 $\pm$ 0.1 a   | 102 $\pm$ 11 de | nd             | 0,8 $\pm$ 0.1 a   | nd              | 2,6 $\pm$ 1.4 ab |
| +Al-Pf               | 2,6 $\pm$ 0.7 c  | 1,9 $\pm$ 0.2 b | 3,7 $\pm$ 0.3 b | 46,6 $\pm$ 7.3 f  | 112 $\pm$ 20 de | 23 $\pm$ 4 a   | 2,3 $\pm$ 0.8 a   | 1,6 $\pm$ 0.3 b | 5,1 $\pm$ 0.5 b  |
| +Al+Pf               | 1,5 $\pm$ 0.5 bc | 2,7 $\pm$ 0.1 b | 8,2 $\pm$ 1.9 c | 26,5 $\pm$ 6.6 e  | 126 $\pm$ 6 de  | 156 $\pm$ 22 c | 1,1 $\pm$ 0.2 a   | 3,0 $\pm$ 1.0 b | 13,3 $\pm$ 2.6 c |
| Pea genotype VIR8473 |                  |                 |                 |                   |                 |                |                   |                 |                  |
| -Al-Pf               | 0,5 $\pm$ 0.3 ab | 3,1 $\pm$ 1.2 b | 0,9 $\pm$ 0.3 a | 1,2 $\pm$ 0.1 a   | 4 $\pm$ 1 a     | 25 $\pm$ 7 a   | 0,4 $\pm$ 0.1 a   | nd              | 3,1 $\pm$ 0.5 ab |
| -Al+Pf               | nd               | 0,7 $\pm$ 0.2 a | 1,1 $\pm$ 0.5 a | 2,9 $\pm$ 0.2 a   | 4 $\pm$ 1 a     | 8 4 a          | 0,9 $\pm$ 0.4 a   | nd              | 3,3 $\pm$ 0.6 ab |
| +Al-Pf               | nd               | 0,6 $\pm$ 0.2 a | 0,6 $\pm$ 0.1 a | 1,0 $\pm$ 0.4 a   | 53 $\pm$ 12 bc  | 4 $\pm$ 1 a    | 0,8 $\pm$ 0.1 a   | nd              | 1,6 $\pm$ 0.3 a  |
| +Al+Pf               | 3,2 $\pm$ 1.0 c  | 2,6 $\pm$ 0.6 b | 8,1 $\pm$ 1.9 c | 15,9 $\pm$ 2.0 d  | 117 $\pm$ 3 de  | 234 $\pm$ 36 d | 9,8 $\pm$ 2.5 d   | nd              | 5,0 $\pm$ 1.9 ab |
| Pea genotype VIR7307 |                  |                 |                 |                   |                 |                |                   |                 |                  |
| -Al-Pf               | 0,3 $\pm$ 0.1 a  | 0,9 $\pm$ 0.1 a | 1,2 $\pm$ 0.3 a | 4,6 $\pm$ 1.3 ab  | 87 $\pm$ 4 d    | 25 $\pm$ 12 a  | 5,1 $\pm$ 1.4 c   | nd              | 11,0 $\pm$ 2.8 c |
| -Al+Pf               | 1,1 $\pm$ 0.4 b  | 0,4 $\pm$ 0.1 a | 0,5 $\pm$ 0.1 a | 4,4 $\pm$ 0.8 ab  | 137 $\pm$ 25 e  | 2 $\pm$ 1 a    | 2,7 $\pm$ 1.1 abc | nd              | nd               |
| +Al-Pf               | 0,3 $\pm$ 0.1 a  | 1,1 $\pm$ 0.1 a | 1,2 $\pm$ 0.1 a | 5,2 $\pm$ 0.2 ab  | 114 $\pm$ 5 de  | 6 $\pm$ 1 a    | 1,6 $\pm$ 0.1 a   | nd              | 1,7 $\pm$ 0.1 a  |
| +Al+Pf               | 0,4 $\pm$ 0.1 a  | 5,8 $\pm$ 1.1 c | 2,9 $\pm$ 1.2 b | 13,9 $\pm$ 4.8 cd | 100 $\pm$ 16 de | 80 $\pm$ 35 b  | 10,1 $\pm$ 1.6 d  | nd              | 6,6 $\pm$ 1.1 b  |
| Pea genotype VIR8353 |                  |                 |                 |                   |                 |                |                   |                 |                  |
| -Al-Pf               | nd               | 1,0 $\pm$ 0.1 a | 0,7 $\pm$ 0.1 a | 4,1 $\pm$ 0.2 ab  | 74 $\pm$ 3 bcd  | 6 $\pm$ 1 a    | 0,5 $\pm$ 0.1 a   | 0,6 $\pm$ 0.1 a | 2,3 $\pm$ 0.3 a  |
| -Al+Pf               | nd               | 6,8 $\pm$ 0.6 c | 2,2 $\pm$ 0.7 b | 8,0 $\pm$ 3.3 bcd | 83 $\pm$ 24 cd  | 13 $\pm$ 1 a   | 5,2 $\pm$ 0.7 c   | 2,7 $\pm$ 0.8 b | 2,5 $\pm$ 0.7 a  |
| +Al-Pf               | nd               | 1,4 $\pm$ 0.1 a | 0,7 $\pm$ 0.2 a | 5,2 $\pm$ 0.8 ab  | 133 $\pm$ 12 e  | 6 $\pm$ 1 a    | 0,7 $\pm$ 0.1 a   | 0,7 $\pm$ 0.1 a | 2,6 $\pm$ 0.3 a  |
| +Al+Pf               | 0,2 $\pm$ 0.1 a  | 6,5 $\pm$ 0.8 c | 3,1 $\pm$ 1.0 b | 6,2 $\pm$ 0.5 abc | 124 $\pm$ 21 e  | 57 $\pm$ 4 b   | 3,7 $\pm$ 0.2 bc  | 3,0 $\pm$ 0.8 b | 5,9 $\pm$ 0.7 b  |

: -Al-Pf — Al-untreated and uninoculated control plants, -Al+Pf — Al-untreated and inoculated plants, +Al-Pf — Al-treated and uninoculated plants, +Al+Pf — Al-treated and inoculated plants. Data are means  $\pm$  SE. Different lowercase letters show significant differences between treatments (least significant difference test,  $p < 0.05$ ,  $n = 3$ ). nd stands for not detected.

Table S5. The effect of Al and *Ps. fluorescens* SPB2137gfp on exudation of sugars ( $\mu\text{g g}^{-1}$  root dry weight) by the studied pea genotypes.

| Treatments           | Sugars           |                    |                    |
|----------------------|------------------|--------------------|--------------------|
|                      | Fructose         | Glucose            | Ribose             |
| Pea genotype VIR1903 |                  |                    |                    |
| -Al-Pf               | $5,8 \pm 0,5$ c  | $1,18 \pm 0,21$ bc | $0,18 \pm 0,05$ b  |
| -Al+Pf               | $0,1 \pm 0,1$ a  | nd                 | nd                 |
| +Al-Pf               | $18,4 \pm 1,9$ d | $3,87 \pm 0,91$ d  | $0,51 \pm 0,05$ c  |
| +Al+Pf               | $4,1 \pm 0,2$ b  | $0,86 \pm 0,36$ b  | $0,50 \pm 0,06$ c  |
| Pea genotype VIR8473 |                  |                    |                    |
| -Al-Pf               | $1,1 \pm 0,1$ ab | $0,17 \pm 0,02$ a  | nd                 |
| -Al+Pf               | $0,2 \pm 0,1$ a  | $0,09 \pm 0,02$ a  | nd                 |
| +Al-Pf               | $2,9 \pm 0,2$ b  | $1,18 \pm 0,21$ b  | nd                 |
| +Al+Pf               | $2,6 \pm 0,3$ b  | $1,71 \pm 0,22$ bc | nd                 |
| Pea genotype VIR7307 |                  |                    |                    |
| -Al-Pf               | $6,8 \pm 1,2$ c  | $1,02 \pm 0,04$ b  | $0,13 \pm 0,01$ a  |
| -Al+Pf               | $0,4 \pm 0,2$ a  | $0,25 \pm 0,04$ a  | nd                 |
| +Al-Pf               | $20,9 \pm 1,0$ d | $2,05 \pm 0,37$ c  | $0,20 \pm 0,01$ ab |
| +Al+Pf               | $18,1 \pm 2,1$ d | $1,05 \pm 0,06$ b  | $0,10 \pm 0,01$ a  |
| Pea genotype VIR8353 |                  |                    |                    |
| -Al-Pf               | $3,0 \pm 0,6$ b  | $0,13 \pm 0,03$ a  | $0,13 \pm 0,01$ a  |
| -Al+Pf               | $0,5 \pm 0,2$ a  | $0,02 \pm 0,01$ a  | nd                 |
| +Al-Pf               | $4,3 \pm 0,3$ b  | $0,17 \pm 0,03$ a  | $0,47 \pm 0,06$ c  |
| +Al+Pf               | $1,9 \pm 0,3$ ab | $0,08 \pm 0,01$ a  | $0,29 \pm 0,05$ b  |

Treatments: -Al-Pf — Al-untreated and uninoculated control plants, -Al+Pf — Al-untreated and inoculated plants, +Al-Pf — Al-treated and uninoculated plants, +Al+Pf — Al-treated and inoculated plants. Data are means  $\pm$  SE. Different lowercase letters show significant differences between treatments (least significant difference test,  $p < 0.05$ ,  $n = 3$ ). nd stands for not detected.

Table S6. Values of Fisher's criterion (F) assessing significance of the effects of factors and their interactions on the studied parameters

| Factors and their interactions | Parameters  |        |             |                    |         |                   |         |        |        |             |                  |        |        |                |             |         |
|--------------------------------|-------------|--------|-------------|--------------------|---------|-------------------|---------|--------|--------|-------------|------------------|--------|--------|----------------|-------------|---------|
|                                | Pea biomass |        |             | Number of bacteria |         | Al concentrations |         |        |        | Solution pH | P concentrations |        |        | Root exudation |             |         |
|                                | Root        | Shoots | Whole plant | Solution           | Roots   | Solution          | Residue | Roots  | Shoots |             | Residue          | Roots  | Shoots | Organic acids  | Amino acids | Sugars  |
| Pea                            | 77 ***      | 16 *** | 57 ***      | 4 *                | 27 ***  | 4 *               | 15 ***  | 34 *** | 18 *** | 61 ***      | 16 ***           | 99 *** | 42 *** | 13 ***         | 10 ***      | 132 *** |
| Al                             | 12 **       | 48 *** | 37 ***      | 143***             | 206 *** | ndt               | ndt     | ndt    | ndt    | 113 ***     | 93 ***           | 42 *** | 1      | 262 ***        | 208 ***     | 348 *** |
| Pf                             | 3           | 9 **   | 10 **       | ndt                | ndt     | 25 ***            | 67 ***  | 19 *** | 1      | 41 ***      | 119 ***          | 1      | 1      | 11 **          | 2           | 144 *** |
| Pea × Al                       | 2           | 4 *    | 4 *         | 7 ***              | 22 ***  | ndt               | ndt     | ndt    | ndt    | 3           | 11 ***           | 3      | 1      | 12 **          | 17 ***      | 64 ***  |
| Pea × Pf                       | 2           | 3 *    | 2           | ndt                | ndt     | 3                 | 6 *     | 1      | < 1    | 2           | 13 ***           | 1      | 1      | 2              | 16 ***      | 35 ***  |
| Al × Pf                        | 2           | 5 *    | 4           | ndt                | ndt     | ndt               | ndt     | ndt    | ndt    | 8 **        | 14 ***           | 2      | < 1    | 2              | 3           | 3       |
| Pea × Al × Pf                  | 0,9         | 3      | 2           | ndt                | ndt     | ndt               | ndt     | ndt    | ndt    | 2           | 4 *              | 1      | < 1    | 2              | 18 ***      | 12 ***  |

Factors: Pea — pea genotype; Al — treatment with Al; Pf — Inoculation with bacteria. F values marked by asterisks show significant effects (\* —  $p < 0.05$ ; \*\* —  $p < 0.01$ ; \*\*\* —  $p < 0.001$ ). ndt stands for not determined.
